# Supplementary material for: Interaction between Fish Skin Gelatin and Pea Protein at Air-Water Interface after Ultrasound Treatment
Source: MDPI journal article supplement (doi:10.3390/foods11050659), 2022-02-23
Supplement: s1 [file s1]

## Supplementary Materials

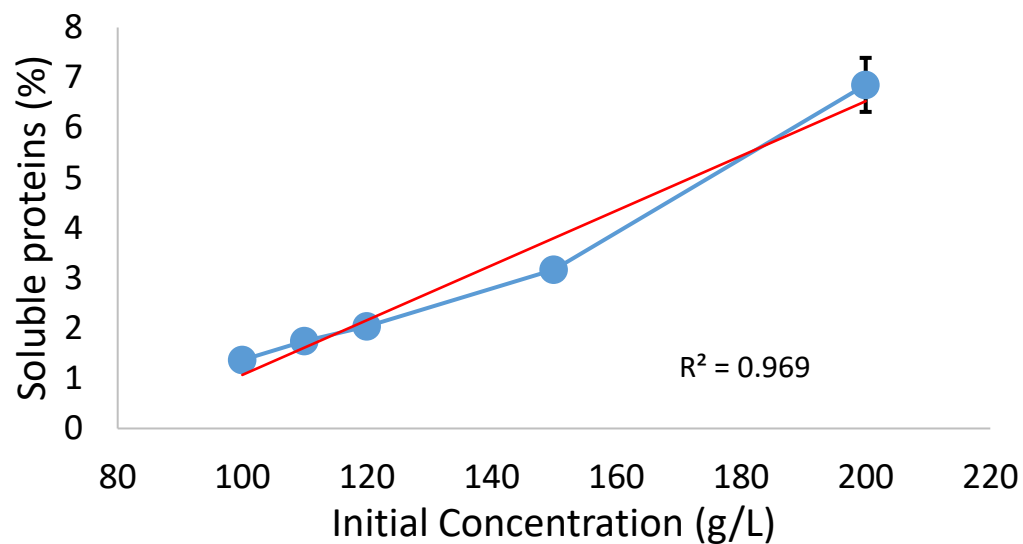

**Figure S1.** Calibration line of PPI supernatant soluble protein content (%). 5 different starting concentrations were analysed by Dumas method after the removal of the insoluble part.

**Table S1.** Soluble protein content of different starting solution concentrations.

| C (g/L) | Soluble Protein (%) |
|---------|---------------------|
| 100     | 1.4 ± 0.03          |
| 110     | 1.8 ± 0.02          |
| 120     | 2.1 ± 0.01          |
| 150     | 3.2 ± 0.03          |
| 200     | 6.9 ± 0.54          |

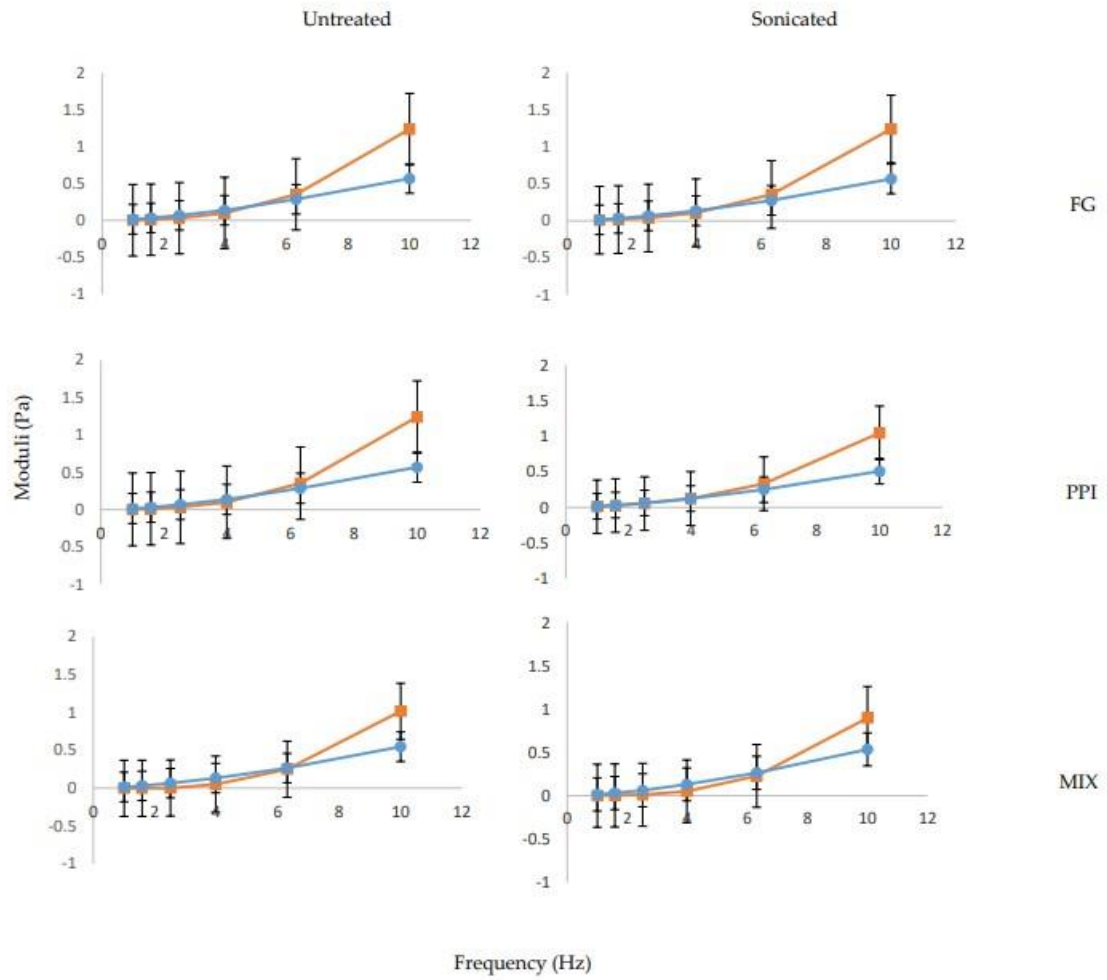

**Figure S2** Viscoelastic properties for all the protein solutions at a frequency range between 1-10 Hz. For all the graphs, elastic modulus ( $G'$ ) is represented in orange squares while viscous modulus ( $G''$ ) is represented in blue dots.

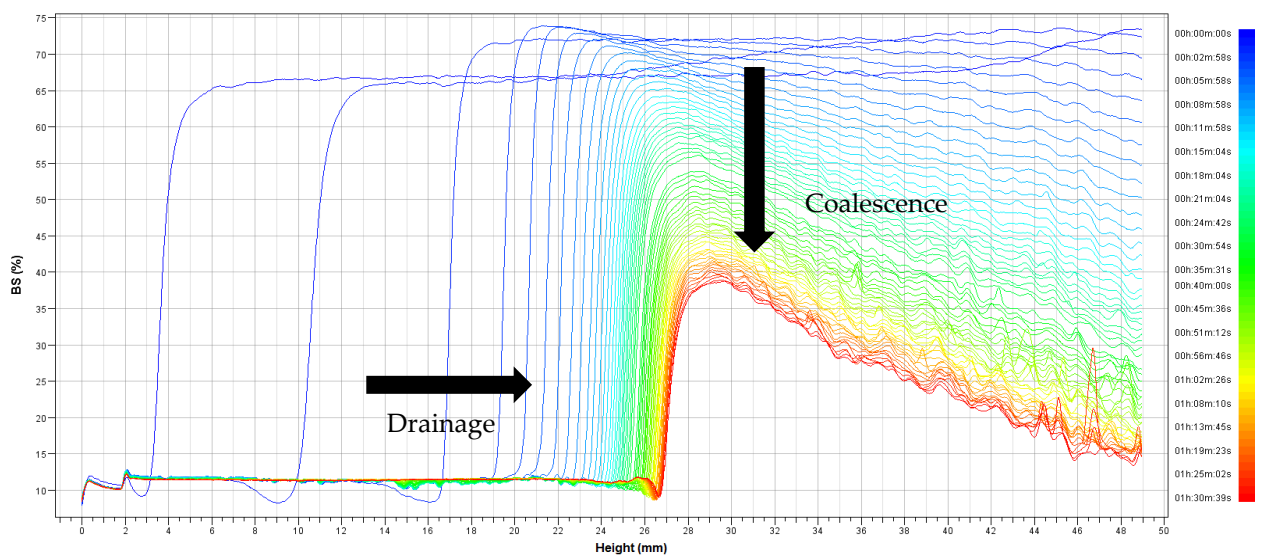

**Figure S3.** BS values (%) of sonicated PPI over the height of the tube and over time as reported by the instrument Turbiscan Tower. On the right side, scan time is reported with a gradient of colors.
